# Supplementary material for: Bimetallic conjugated metal–organic frameworks as bifunctional electrocatalysts for overall water splitting
Source: Royal Society of Chemistry journal article supplement (doi:10.1039/d3nr00938f), 2023-01-01
Supplement: d3nr00938f1.pdf [file d3nr00938f1.pdf]

## Supplement Information

# Bimetallic conjugated metal-organic frameworks as bifunctional electrocatalysts for overall water splitting

*Tsz Lok Wan<sup>1</sup>, Junxian Liu<sup>1</sup>, Xin Tan<sup>2</sup>, Minghao Liu<sup>1</sup>, Sean Smith<sup>3\*</sup>, Liangzhi Kou<sup>1\*</sup>*

<sup>1</sup> School of Mechanical, Medical and Process Engineering, Queensland University of  
Technology, Brisbane, QLD, Australia.

<sup>2</sup> Institute for Carbon Neutralization, College of Chemistry and Materials Engineering, Wenzhou  
University, Wenzhou, Zhejiang 325035, P.R. China.

<sup>3</sup> Integrated Materials Design Laboratory, Department of Applied Mathematics, Research School  
of Physics, The Australian National University, Canberra, ACT, Australia.

[sean.smith@anu.edu.au](mailto:sean.smith@anu.edu.au); [liangzhi.kou@qut.edu.au](mailto:liangzhi.kou@qut.edu.au)

## Additional computational details for DFT calculations

For OER, the absorption energies of all reaction intermediates OH\*, O\*, OOH\* were calculated follows:

$$\Delta E_{OH^*} = E_{OH^*} - E_T - E_{H_2O} + \frac{1}{2}E_{H_2} \quad (S1)$$

$$\Delta E_{O^*} = E_{O^*} - E_T - E_{H_2O} + E_{H_2} \quad (S2)$$

$$\Delta E_{OOH^*} = E_{OOH^*} - E_T - 2E_{H_2O} + \frac{3}{2}E_{H_2} \quad (S3)$$

where  $E_T$ ,  $E_{OH^*}$ ,  $E_{O^*}$ ,  $E_{OOH^*}$  are the total energy of the studied catalyst without adsorbed intermediate, and that adsorbed by OH\*, O\* and OOH\* intermediates, respectively.  $E_{H_2O}$  and  $E_{H_2}$  are the energies of H<sub>2</sub>O and H<sub>2</sub> molecule in the gas phase. The correction added to the adsorption energy to obtain the free energy is 0.05, 0.35, and 0.40 eV for adsorbed O, OH, and OOH, respectively.<sup>1</sup> the Gibbs free energy charges  $\Delta G_{OER}$  (OER = OH\*, O\*, OOH\*) are defined as following equation:

$$\Delta G_{OH^*} = \Delta E_{OH^*} - 0.35 \text{ eV} \quad (S4)$$

$$\Delta G_{O^*} = \Delta E_{O^*} - 0.05 \text{ eV} \quad (S5)$$

$$\Delta G_{OOH^*} = \Delta E_{OOH^*} - 0.4 \text{ eV} \quad (S6)$$

where  $\Delta G_{OH^*}$ ,  $\Delta G_{O^*}$ , and  $\Delta G_{OOH^*}$  denote the free energy changes of the studied catalyst with adsorbed OH\*, O\*, and OOH\* intermediates, respectively. Each step of reaction free energy charges  $\Delta G_i$  ( $i = 1, 2, 3, 4$ ) can be determined by the following equation:

$$\Delta G_1 = \Delta G_{OH^*} - \Delta G_{H_2O} \quad (S7)$$

$$\Delta G_2 = \Delta G_{O^*} - \Delta G_{OH^*} \quad (S8)$$

$$\Delta G_3 = \Delta G_{OOH^*} - \Delta G_{O^*} \quad (S9)$$

$$\Delta G_4 = \Delta G_{O_2} - \Delta G_{OOH^*} \quad (S10)$$

where  $\Delta G_1$ ,  $\Delta G_2$ ,  $\Delta G_3$  and  $\Delta G_4$  are the Gibbs free energy change for the four OER steps:  $OH^*$  formation by dissociative adsorption of  $H_2O$ ,  $O^*$  formation by deprotonation,  $O^*$  oxidation to  $OOH^*$ ,  $O_2$  formation and release.

For HER, the absorption energies of  $H^*$  was calculated follows:

$$\Delta E_{H^*} = E_{H^*} - E_T - \frac{1}{2}E_{H_2} \quad (S11)$$

where  $E_{H^*}$  is the total energy of the studied catalyst with  $H^*$  intermediate. The correction added to the adsorption energy to obtain the free energy is 0.24 eV for adsorbed H intermediate.<sup>2</sup> This means that

$$\Delta G_{H^*} = \Delta E_{H^*} + 0.24 \text{ eV} \quad (S12)$$

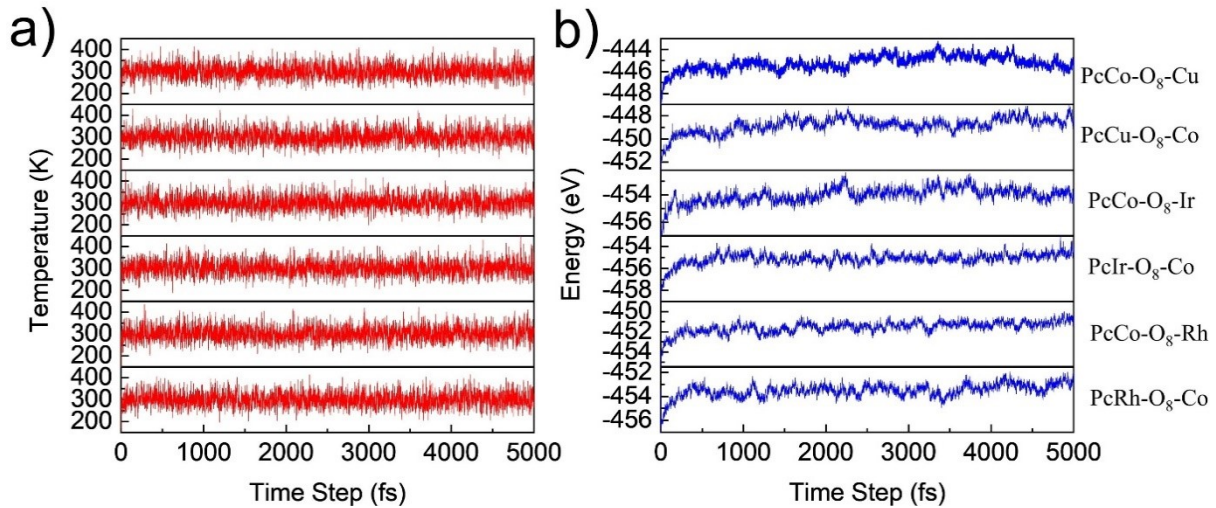

**Fig. S1** The variations of temperature and energy versus the time for AIMD simulations of all designed PcTM-O<sub>8</sub>-TM' 2D c-MOFs under 300 K for 5000 fs.

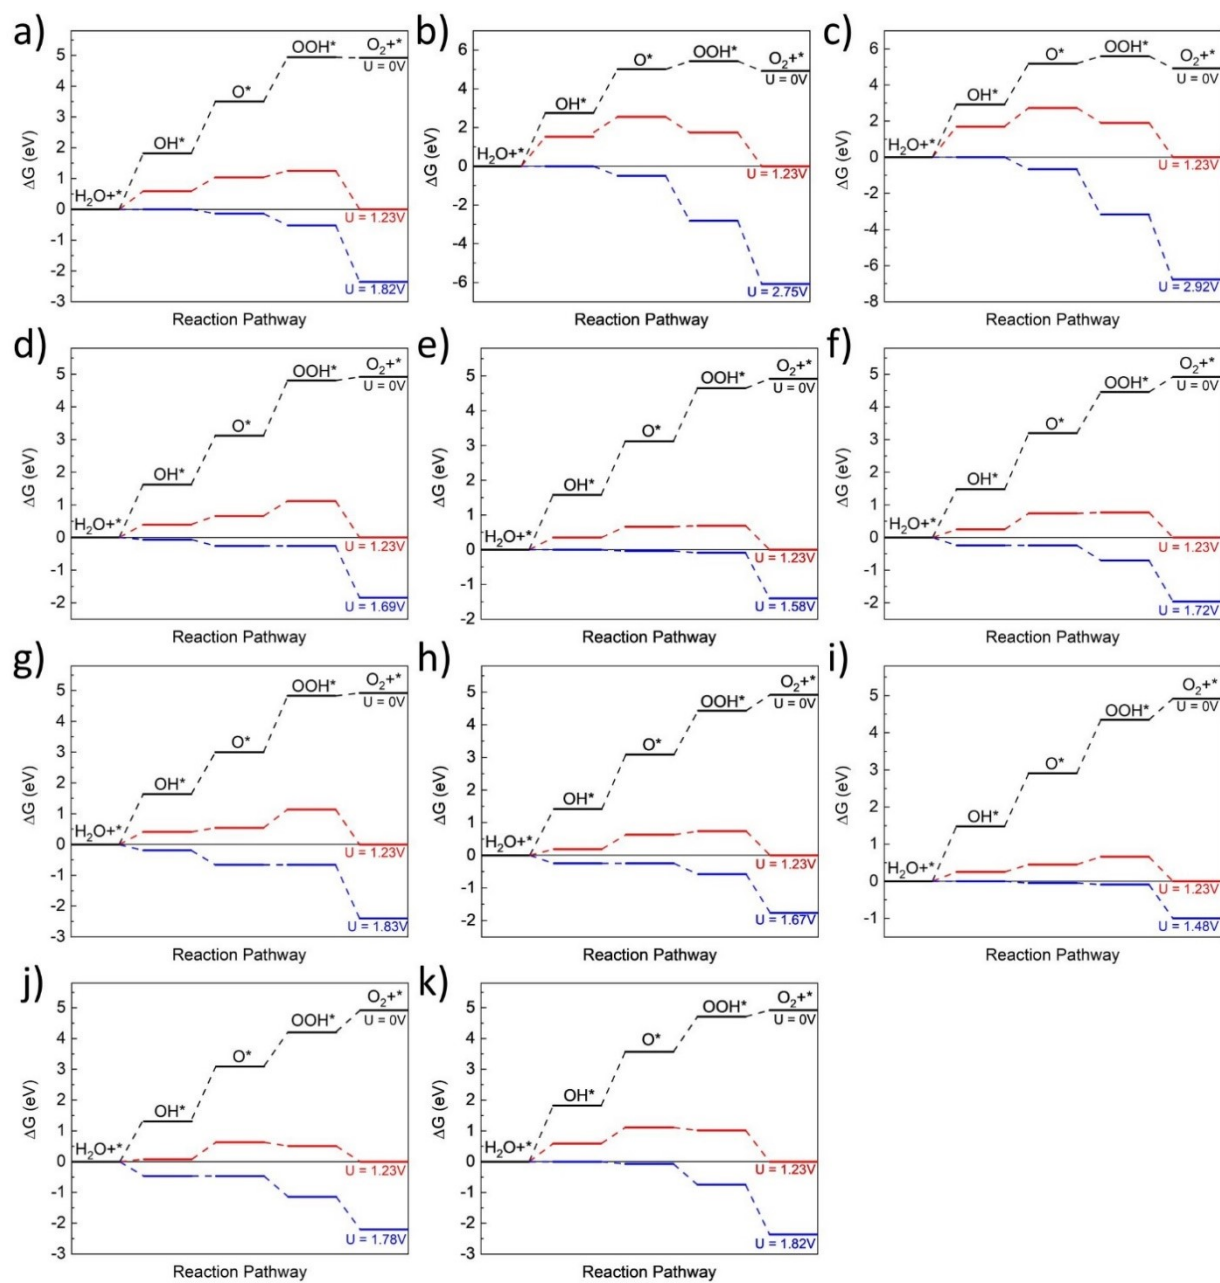

**Fig. S2** Reaction diagram of the OER on the PcTM-O<sub>8</sub>-TM' 2D c-MOFs. The structure of a) PcCo-O<sub>8</sub>-Cu-A, b) PcCo-O<sub>8</sub>-Cu-B, c) PcCu-O<sub>8</sub>-Co-A, d) PcCu-O<sub>8</sub>-Co-B, e) PcCo-O<sub>8</sub>-Ir-A, f) PcIr-O<sub>8</sub>-Co-A, g) PcIr-O<sub>8</sub>-Co-B, h) PcCo-O<sub>8</sub>-Rh-A, i) PcCo-O<sub>8</sub>-Rh-B, j) PcRh-O<sub>8</sub>-Co-A, k) PcRh-O<sub>8</sub>-Co-B. The value of onset potential is marked in diagram.

**Table S1.** Reaction free energies  $\Delta G_i$  ( $i = 1, 2, 3, 4$ ) of intermediate steps ( $U = 0V$ ) at oxygen active sites. The values in the bracket and red denote the chemical reaction process on the B site and the largest energy difference, respectively.

| Systems                 | $\Delta G_1$   | $\Delta G_2$   | $\Delta G_3$   | $\Delta G_4$     |
|-------------------------|----------------|----------------|----------------|------------------|
| PcCo-O <sub>8</sub> -Cu | 1.82<br>(2.75) | 1.68<br>(2.26) | 1.44<br>(0.42) | -0.02<br>(-0.51) |
| PcCu-O <sub>8</sub> -Co | 2.92<br>(1.62) | 2.25<br>(1.50) | 0.41<br>(1.69) | -0.67<br>(0.11)  |
| PcCo-O <sub>8</sub> -Ir | 1.58<br>(N/A)  | 1.54<br>(N/A)  | 1.53<br>(N/A)  | 0.27<br>(N/A)    |
| PcIr-O <sub>8</sub> -Co | 1.48<br>(1.64) | 1.72<br>(1.36) | 1.26<br>(1.83) | 0.46<br>(-0.04)  |
| PcCo-O <sub>8</sub> -Rh | 1.42<br>(1.48) | 1.67<br>(1.43) | 1.34<br>(1.44) | 0.49<br>(0.57)   |
| PcRh-O <sub>8</sub> -Co | 1.31<br>(1.82) | 1.78<br>(1.75) | 1.11<br>(1.14) | 0.72<br>(0.21)   |

**Table S2.** Electron transfer ( $e$ ) of TM, N, and O atoms at PcTM-O<sub>8</sub>-TM'. ( $Q_{TM}$ ,  $Q_{TM'}$ ,  $Q_N$ , and  $Q_O$  in  $e$  per unit cell)

| Systems                 | $Q_{TM}$ | $Q_{TM'}$ | $Q_N$                      | $Q_O$                      |
|-------------------------|----------|-----------|----------------------------|----------------------------|
| PcCo-O <sub>8</sub> -Cu | -0.94    | -0.91     | +0.43/+0.38<br>+0.37/+0.42 | +0.80/+0.77<br>+0.85/+0.75 |

|                         |       |       |             |             |
|-------------------------|-------|-------|-------------|-------------|
| PcCu-O <sub>8</sub> -Co | -0.82 | -1.17 | +0.72/+0.89 | +0.51/+0.52 |
|                         |       |       | +0.82/+0.89 | +0.52/+0.52 |
| PcCo-O <sub>8</sub> -Ir | -0.93 | -1.86 | +0.42/+0.38 | +0.68/+0.68 |
|                         |       |       | +0.38/+0.42 | +0.69/+0.69 |
| PcIr-O <sub>8</sub> -Co | -1.68 | -1.18 | +0.56/+0.60 | +0.52/+0.51 |
|                         |       |       | +0.59/+0.60 | +0.52/+0.52 |
| PcCo-O <sub>8</sub> -Rh | -0.93 | -1.48 | +0.42/+0.37 | +0.59/+0.60 |
|                         |       |       | +0.38/+0.43 | +0.61/+0.60 |
| PcRh-O <sub>8</sub> -Co | -1.33 | -1.18 | +0.49/+0.52 | +0.52/+0.52 |
|                         |       |       | +0.51/+0.52 | +0.52/+0.52 |

**Table S3.** Reaction free energies  $\Delta G_i$  ( $i = 1, 2, 3, 4$ ) of intermediate steps ( $U = 0V$ ) at PcCo-O<sub>8</sub>-Rh under tensile strain. The values in the bracket and red denote the chemical reaction process on the B site and the largest energy difference, respectively.

| Stain (%) | $\Delta G_1$ | $\Delta G_2$ | $\Delta G_3$ | $\Delta G_4$ |
|-----------|--------------|--------------|--------------|--------------|
| 0         | 1.42         | 1.67         | 1.34         | 0.49         |
|           | (1.48)       | (1.43)       | (1.44)       | (0.57)       |
| 1         | 1.70         | 1.35         | 1.23         | 0.64         |
|           | (1.59)       | (0.86)       | (1.50)       | (0.97)       |
| 2         | 1.72         | 1.28         | 1.23         | 0.69         |
|           | (1.62)       | (0.82)       | (1.43)       | (1.05)       |
| 3         | 1.74         | 1.22         | 0.23         | 0.73         |
|           | (1.64)       | (0.76)       | (1.42)       | (1.10)       |

Table S4. The intermediates adsorptions on the PcCo-O<sub>8</sub>-Rh-B under the synergetic effect with the A site: Gibbs free energy change of OH\*, O\*, OOH\*, H\* intermediate of OER and HER ( $\Delta G_{\text{OH}^*}$ ,  $\Delta G_{\text{O}^*}$ ,  $\Delta G_{\text{OOH}^*}$ ,  $\Delta G_{\text{H}^*}$  in eV), overpotential ( $\eta_{\text{OER}}$  in V), onset potential ( $U_{\text{HER}}$  and  $U_{\text{OER}}$  in V).

|                                              | $\Delta G_{\text{OH}^*}$ | $\Delta G_{\text{O}^*}$ | $\Delta G_{\text{OOH}^*}$ | $\Delta G_{\text{H}^*}$ | $\eta_{\text{OER}}$ | $U_{\text{HER}}$ | $U_{\text{OER}}$ |
|----------------------------------------------|--------------------------|-------------------------|---------------------------|-------------------------|---------------------|------------------|------------------|
| PcCo-O <sub>8</sub> -Rh-B<br>(synergetic)    | 1.51                     | 2.51                    | 3.57                      | -0.17                   | 0.28                | -0.17            | 1.51             |
| PcCo-O <sub>8</sub> -Rh-B<br>(un-synergetic) | 1.48                     | 2.91                    | 4.35                      | -0.19                   | 0.25                | -0.19            | 1.48             |

Table S5. Electron transfer of Co, Rh, N and O atoms at PcCo-O<sub>8</sub>-Rh under tensile strain. ( $Q_{\text{Co}}$ ,  $Q_{\text{Rh}}$ ,  $Q_{\text{N}}$ ,  $Q_{\text{O}}$  in e per unit cell)

| Stain (%) | $Q_{\text{Co}}$ | $Q_{\text{Rh}}$ | $Q_{\text{N}}$ | $Q_{\text{O}}$ |
|-----------|-----------------|-----------------|----------------|----------------|
| 0         | -0.93           | -1.48           | +0.42/+0.37    | +0.59/+0.60    |
|           |                 |                 | +0.38/+0.43    | +0.61/+0.60    |
| 1         | -0.88           | -1.19           | +0.40/+0.35    | +0.58/+0.58    |
|           |                 |                 | +0.36/+0.41    | +0.60/+0.59    |
| 2         | -0.78           | -1.12           | +0.38/+0.33    | +0.56/+0.57    |
|           |                 |                 | +0.35/+0.39    | +0.58/+0.57    |
| 3         | -0.70           | -0.94           | +0.36/+0.30    | +0.54/+0.56    |
|           |                 |                 | +0.33/+0.37    | +0.56/+0.55    |

## References

1. J. Rossmeisl, Z.-W. Qu, H. Zhu, G.-J. Kroes and J. K. Nørskov, *J. Electroanal. Chem.*, 2007, **607**, 83-89.
2. J. K. Nørskov, T. Bligaard, A. Logadottir, J. Kitchin, J. G. Chen, S. Pandelov and U. Stimming, *J. Electrochem. Soc.*, 2005, **152**, J23.
